# Supplementary material
Source: PubMed Central journal article supplement (PMC3291104)
Supplement: NIHMS327404-supplement-Table_1.pdf [file NIHMS327404-supplement-Table_1.pdf]

**Supplement Tables:**

**Supplement Table 1: Pulmonary Function Testing: Individual Patient Results.**

| PT            | 1  |      |           | 2   |      |            | 3  |        |            | 4  |      |            | 5   |      |           | 6         |           |           |
|---------------|----|------|-----------|-----|------|------------|----|--------|------------|----|------|------------|-----|------|-----------|-----------|-----------|-----------|
|               | BL | Wk16 | Δ         | BL  | Wk16 | Δ          | BL | Wk16   | Δ          | BL | Wk16 | Δ          | BL  | Wk16 | Δ         | BL        | Wk16      | Δ         |
| <b>FVC %</b>  | 53 | 66   | <b>13</b> | 84  | 80   | <b>-4</b>  | 87 | 91     | <b>4</b>   | 63 | 72   | <b>9</b>   | 85  | 77   | <b>-7</b> | 67        | 75        | <b>8</b>  |
| <b>FEV1 %</b> | 54 | 60   | <b>6</b>  | 71  | 69   | <b>-2</b>  | 86 | 87     | <b>1</b>   | 67 | 77   | <b>10</b>  | 87  | 79   | <b>-8</b> | 74        | 88        | <b>14</b> |
| <b>TLC %</b>  | 72 | 82   | <b>10</b> | 118 | 114  | <b>-4</b>  | 99 | 106    | <b>7</b>   | 67 | 76   | <b>9</b>   | 78  | 76   | <b>-2</b> | 80        | 82        | <b>2</b>  |
| <b>DLCO%</b>  | 55 | 65   | <b>10</b> | 89  | 67   | <b>-22</b> | 78 | 70     | <b>-8</b>  | 26 | 27   | <b>1</b>   | 101 | 96   | <b>-5</b> | 61        | 65        | <b>4</b>  |
| PT            | 7  |      |           | 8   |      |            | 9  |        |            | 10 |      |            | 11  |      |           | MEDIAN    |           |           |
|               | BL | Wk16 | Δ         | BL  | Wk16 | Δ          | BL | Wk16** | Δ          | BL | Wk16 | Δ          | BL  | Wk16 | Δ         | BL        | Wk16      | Δ         |
| <b>FVC %</b>  | 80 | 82   | <b>2</b>  | 92  | 71   | <b>-21</b> | 59 | 58     | <b>-1</b>  | 62 | 59   | <b>-3</b>  | 98  | 105  | <b>7</b>  | <b>80</b> | <b>75</b> | <b>2</b>  |
| <b>FEV1 %</b> | 74 | 85   | <b>11</b> | 74  | 76   | <b>6</b>   | 63 | 58     | <b>-5</b>  | 62 | 65   | <b>3</b>   | 107 | 116  | <b>9</b>  | <b>74</b> | <b>77</b> | <b>6</b>  |
| <b>TLC %</b>  | 95 | 97   | <b>2</b>  | 73  | 72   | <b>-1</b>  | 72 | 72     | <b>0</b>   | 83 | 73   | <b>-10</b> | 98  | 109  | <b>11</b> | <b>80</b> | <b>82</b> | <b>2</b>  |
| <b>DLCO%</b>  | 54 | 51   | <b>-3</b> | NA  | 54   | <b>NA</b>  | 60 | 45     | <b>-15</b> | 55 | 56   | <b>1</b>   | 70  | 67   | <b>-3</b> | <b>61</b> | <b>65</b> | <b>-3</b> |

PT= patient, BL= baseline, Wk16=week 16, Δ= change, FVC= forced vital capacity, FEV1= forced expiratory volume in 1 second, TLC=total lung capacity, DLCO= diffusion capacity, %=percent, FVC, FEV1, and TLC were measured in liters, % of predicted is reported. DLCO was measured in milliliters/minute/millimeter of mercury and reported in % predicted. NA- technically inadequate/not available, \*\* Patient #9 had a severe respiratory infection at the time of this test. All other testing (6MWD, ETT, Echo, Labs, RHC) were delayed 4 weeks until resolution of this infection.
