# Supplementary material
Source: PubMed Central journal article supplement (PMC3291104)
Supplement: NIHMS327404-supplement-Table_2.pdf [file NIHMS327404-supplement-Table_2.pdf]

**Supplement Table 2: NT-proBNP Levels: Individual Patient Results.**

| NT-proBNP (pg/mL) |      |        |        |         |         |                  |
|-------------------|------|--------|--------|---------|---------|------------------|
| PT                | BL   | Week 4 | Week 8 | Week 12 | Week 16 | Overall $\Delta$ |
| 1                 | 3244 | 2848   | 3279   | 4393    | 3048    | -196             |
| 2                 | 221  | 802    | 515    | 358     | 192     | -29              |
| 3                 | 524  | 379    | 231    | 333     | 279     | -245             |
| 4                 | 308  | 269    | 282    | 548     | 350     | 42               |
| 5                 | 32   | 9      | 19     | 23      | 20      | -12              |
| 6                 | 144  | 247    | 710    | 547     | 410     | 266              |
| 7                 | 157  | 579    | 352    | 356     | 378     | 221              |
| 8                 | 357  | 167    | 244    | 183     | 176     | -181             |
| 9                 | 2922 | 3681   | 9630   | 4382    | 2231*   | -691             |
| 10                | 4531 | 2768   | 1933   | 2055    | 2556    | -1975            |
| 11                | 2172 | 3109   | 2985   | 3935    | 3937    | 1765             |
| <b>Median</b>     | 357  | 579    | 515    | 547     | 378     | -29              |

NT-proBNP measurements were done in the morning prior to the six minute walk test.

NT-proBNP= N-terminal basic naturetic peptide; pg/mL= picograms /milliliter,  $\Delta$ = change, BL= baseline

\* visit delayed 4 weeks due to upper respiratory infection
